# Supplementary material
Source: publisher figshare collection journal article supplement (https://frontiersin.figshare.com/ndownloader/files/16171106)
Supplement: Supplementary file [file 16171106]

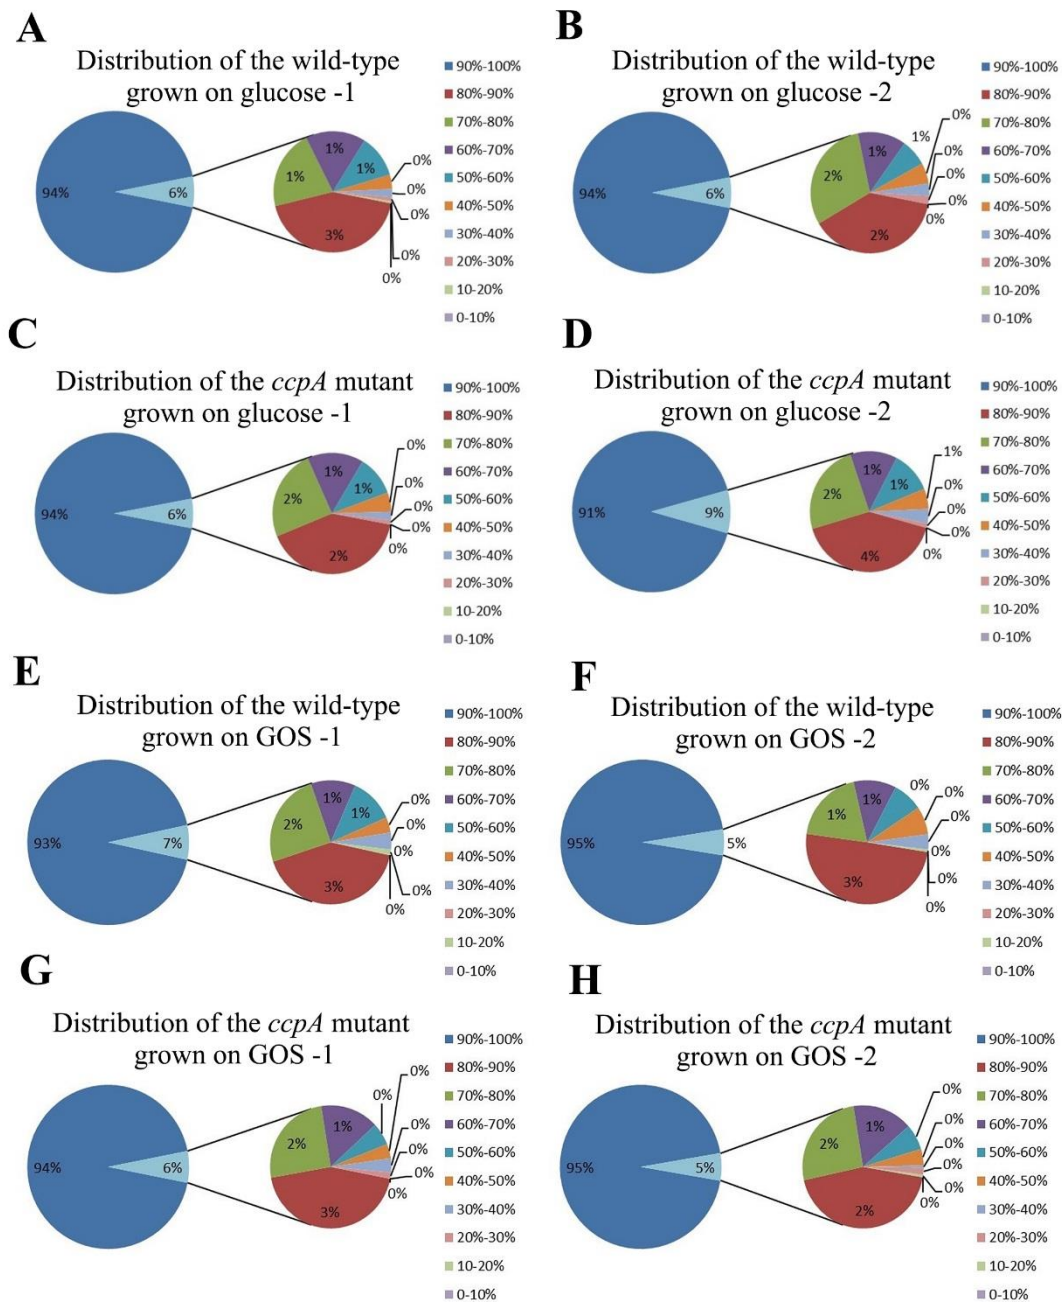

**Supplementary Figure 2.** Gene coverage distribution of the transcriptome data in the four conditions. The percentage indicates the ratio of the number of genes in different coverage intervals to the total number of genes.
